# Supplementary material for: Creation and Use of Highly Adaptive Productive and Technological Red Currant Genotypes to Improve the Assortment and Introduction into Different Ecological and Geographical Zones
Source: MDPI journal article supplement (doi:10.3390/plants11060802), 2022-03-17
Supplement: s1 [file s1]

**Table S2.** The scale used for the assessment of flowering and fruiting of the genotypes during vegetation period.

| Score | Important adaptive, economical and biological traits                                                                                                                                                                                                                                          |
|-------|-----------------------------------------------------------------------------------------------------------------------------------------------------------------------------------------------------------------------------------------------------------------------------------------------|
| 1.0   | Plants have a single, weak annual growth (less than 5% per bush), the leaves are deformed, not of a typical shape, lag behind in the timing of the passage of phenological phases (flowering and fruiting), single flowers (up to 10% per bush) and the ovary is almost completely crumbling. |
| 2.0   | Plants have up to 10% annual growth, flowering and fruiting are weak (up to 20%) on individual branches or on the top of shoots, shedding up to 30-40% of berries                                                                                                                             |
| 3.0   | Plants are not much weakened, annual growth of up to 25% per bush, flowering up to 50% of at least ½ of the length of the shoot, shedding of berries up to 20%                                                                                                                                |
| 4.0   | The plants have well-leafed bushes, the annual growth is 25-30% per bush, flowering is from 60-70% per bush, the shedding of berries is up to 10-15%                                                                                                                                          |
| 5.0   | Healthy plants, good strong annual growth of 40-50% per bush, flowering is along the entire length of the shoot, more than 75%, low berry shedding, individual berries (up to 5%)                                                                                                             |
