# Supplementary material for: Creation and Use of Highly Adaptive Productive and Technological Red Currant Genotypes to Improve the Assortment and Introduction into Different Ecological and Geographical Zones
Source: MDPI journal article supplement (doi:10.3390/plants11060802), 2022-03-17
Supplement: s1 [file s1]

**Table S3.** Indicators of diseases and pests of red currant genotypes

| Score | <i>Sphaerotheca mors-uvae</i>                                                                                                    | <i>Pseudopeziza ribis</i>                                    | <i>Cecidophyopsis ribis</i>                            |
|-------|----------------------------------------------------------------------------------------------------------------------------------|--------------------------------------------------------------|--------------------------------------------------------|
| 0     | No infection (healthy plant)                                                                                                     | No infection (healthy plant)                                 | No damage (healthy plant)                              |
| 1.0   | Very weak disease damage (up to 10% of leaves and up to 1% of berries are affected)                                              | Very weak damage (up to 5% leaves are affected)              | Damage to single buds (до 5%)                          |
| 2.0   | Weak plant disease (up to ¼ of the shrub shoots, up to 25% of leaves and up to 3% of berries are affected)                       | Weak plant damage (up to 10% of the leaves are damaged)      | Up to 10% of buds on one plant are damaged by mite     |
| 3.0   | Average plant disease (up to ½ of the shrub shoots, 26-50% of the leaves and up to 10% of the berries are affected)              | Average plant damage (up to 30% of leaves are damaged)       | Up to 30% of buds on one plant are damaged by mite 30% |
| 4.0   | Severe plant disease (½ to ¾ of the shrub shoots, 51-70% of the leaves and up to 20% of the berries are affected)                | Severe plant damage (up to 50% of the leaves are damaged)    | Severe damage, from 30 to 50% of buds on one plant.    |
| 5.0   | Very severe disease (more than ¾ of the shrub shoots, more than 70% of the leaves and more than 20% of the berries are affected) | Very severe damage (more than 50% of the leaves are damaged) | More than 50% of buds on one plant are damaged.        |
