# Supplementary material for: Creation and Use of Highly Adaptive Productive and Technological Red Currant Genotypes to Improve the Assortment and Introduction into Different Ecological and Geographical Zones
Source: MDPI journal article supplement (doi:10.3390/plants11060802), 2022-03-17
Supplement: s1 [file s1]

**Table S1.** The scale used for the assessment of cold damage on the genotypes.

| Score | Signs of damage                                                                                                                                                                                                                             |
|-------|---------------------------------------------------------------------------------------------------------------------------------------------------------------------------------------------------------------------------------------------|
| 0     | No signs of freezing                                                                                                                                                                                                                        |
| 1.0   | Freezing of the upper part of annual shoots ( $\frac{1}{4}$ of their length). The number of frozen annual shoots is not more than 10% and up to 10% of generative buds from one bush, perennial shoots and vegetative buds are not damaged. |
| 2.0   | Freezing of no more than 20%-25% of annual increments (up to $\frac{1}{2}$ of their length), up to 25% of generative buds from one bush, up to 10% freezing of perennial shoots                                                             |
| 3.0   | Up to 70% of annual shoots are damaged (more than $\frac{1}{2}$ of their length), 25-50% of generative buds are frozen, up to 25% of two-year-old and single (up to 10%) perennial shoots from one bush are frozen                          |
| 4.0   | Total (100%) damage to annual shoots; freezing of generative buds up to 75%; two-year and perennial shoots are damaged up to 75%; bush renewal comes from lower (dormant) buds                                                              |
| 5.0   | Complete (100%) freezing of the aboveground part of the bush, there is no renewal of the bush                                                                                                                                               |
