# Supplementary material for: Creation and Use of Highly Adaptive Productive and Technological Red Currant Genotypes to Improve the Assortment and Introduction into Different Ecological and Geographical Zones
Source: Plants (Basel). 2022 Mar 17;11(6):802. doi: 10.3390/plants11060802 (PMC8954894; doi:10.3390/plants11060802)
Supplement: Supplementary file 1 [file plants-11-00802-s001.zip]

Archive with 9 entries (9 files):
- Supplement 1.xls
- Supplement 10.pdf
- Supplement 2.xls
- Supplement 3.xls
- Supplement 4.xls
- Supplement 5.xls
- Supplement 6 .xls
- Supplement 8.pdf
- Supplement 9.pdf
