# Supplementary material for: Creation and Use of Highly Adaptive Productive and Technological Red Currant Genotypes to Improve the Assortment and Introduction into Different Ecological and Geographical Zones
Source: Plants (Basel). 2022 Mar 17;11(6):802. doi: 10.3390/plants11060802 (PMC8954894; doi:10.3390/plants11060802)
Supplement: Supplementary file 1 [file plants-11-00802-s001.zip › Supplement 1.xls]

## Sheet: Supplement 1 
Flowering Scores (1-5 scale)
	Years
Genotypes	y 2013	y 2014	y 2015	y 2016	y 2017	y 2018
44-5-2	4	3	3	5	3	4
44-5-2	4	3	3	5	3	4
44-5-2	4	3	3	4	3	4
44-5-2	4	4	3	4	4	5
44-5-2	4	4	3	4	4	5
78-2-115	3	4	4	3	3	4
78-2-115	3	4	4	3	3	4
78-2-115	3	4	4	3	3	4
78-2-115	3	4	4	3	4	4
78-2-115	3	4	4	3	4	4
143-23-25	4	3	3	4	3	4
143-23-25	4	3	3	4	3	5
143-23-25	4	3	3	4	3	5
143-23-25	4	3	3	4	3	4
143-23-25	4	3	3	4	3	4
1426-21-80	4	4	4	5	5	5
1426-21-80	4	5	4	5	5	5
1426-21-80	4	5	4	5	5	5
1426-21-80	4	4	4	5	5	5
1426-21-80	4	4	5	5	5	5
271-58-24	3	3	3	3	3	4
271-58-24	3	3	3	3	3	4
271-58-24	3	3	3	3	3	4
271-58-24	4	4	4	4	3	4
271-58-24	4	4	4	4	3	4
261-65-19	3	3	3	3	3	3
261-65-19	3	3	4	3	3	3
261-65-19	3	3	4	3	3	4
261-65-19	3	4	4	3	3	3
261-65-19	3	4	3	3	3	4
77-1-47	4	3	3	4	3	4
77-1-47	4	4	3	4	3	4
77-1-47	4	4	3	4	3	5
77-1-47	4	3	3	4	3	5
77-1-47	4	3	3	4	3	4
Jonkheer van Tets (st.)	3	3	3	3	3	3
Jonkheer van Tets (st.)	3	4	3	4	3	4
Jonkheer van Tets (st.)	3	4	3	4	3	4
Jonkheer van Tets (st.)	3	3	3	3	3	3
Jonkheer van Tets (st.)	3	3	3	3	3	3
	Years
Genotypes	y 2013	y 2014	y 2015	y 2016	y 2017	y 2018
44-5-2	4	3.4	3	4.4	3.4	4.4
78-2-115	3	4	4	3	3.4	4
143-23-25	4	3	3	4	3	4.4
1426-21-80	4	4.4	4.2	5	5	5
271-58-24	3.4	3.4	3.4	3.4	3	4
261-65-19	3	3.4	3.6	3	3	3.4
77-1-47	4	3.4	3	4	3	4.4
Jonkheer van Tets (st.)	3	3.4	3	3.4	3	3.4
	Years
Genotypes	y 2013	y 2014	y 2015	y 2016	y 2017	y 2018
44-5-2	0	0.547723	0	0.547723	0.547723	0.547723
78-2-115	0	0	0	0	0.547723	0
143-23-25	0	0	0	0	0	0.547723
1426-21-80	0	0.547723	0.447214	0	0	0
271-58-24	0.547723	0.547723	0.547723	0.547723	0	0
261-65-19	0	0.547723	0.547723	0	0	0.547723
77-1-47	0	0.547723	0	0	0	0.547723
Jonkheer van Tets (st.)	0	0.547723	0	0.547723	0	0.547723
