# Supplementary material for: Creation and Use of Highly Adaptive Productive and Technological Red Currant Genotypes to Improve the Assortment and Introduction into Different Ecological and Geographical Zones
Source: Plants (Basel). 2022 Mar 17;11(6):802. doi: 10.3390/plants11060802 (PMC8954894; doi:10.3390/plants11060802)
Supplement: Supplementary file 1 [file plants-11-00802-s001.zip › Supplement 3.xls]

## Sheet: Supplement 3
Yield (t/ha)
	Years
Genotypes	y 2013	y 2014	y 2015	y 2016	y 2017	y 2018	Sum
44-5-2	17.17	16.09	14.72	18.57	12.97	19.27	98.79
44-5-2	17.63	16.52	15.33	19.33	13.77	19.75	102.33
44-5-2	17.7	16.52	15.1	18.8	13.15	19.77	101.04
78-2-115	7.1	9.17	8.5	13.92	12.79	14.87	66.35
78-2-115	6.92	8.96	8.38	13.8	12.62	14.7	65.38
78-2-115	6.98	8.75	8.33	13.68	12.38	14.53	64.65
143-23-25	16.26	12.24	11.94	14.29	15.02	16.89	86.64
143-23-25	17.17	13.06	13.31	15.11	15.94	16.71	91.3
143-23-25	16.7	12.52	12.56	14.7	15.37	16.8	88.65
1426-21-80	13.34	9.8	9.9	22.4	17.4	7	79.84
1426-21-80	12.76	9.46	9.26	20.85	16.76	6.45	75.54
1426-21-80	13.94	10.14	10.24	23.9	18.04	7.56	83.82
271-58-24	10.23	6.06	9.5	7.44	9.16	7.56	49.95
271-58-24	9.34	5.14	8.14	6.44	7.87	6.24	43.17
271-58-24	10.12	5.6	8.43	7.12	8.23	7.21	46.71
261-65-19	10.56	4.92	7.7	11.18	10	10.56	54.92
261-65-19	11.4	4.99	7.81	11.58	10.33	10.53	56.64
261-65-19	10.44	4.82	7.6	10.82	10.14	10.46	54.28
77-1-47	9.47	8.03	7.34	9.12	10.65	12.09	56.7
77-1-47	10.33	8.6	8.34	9.68	11.55	12.66	61.16
77-1-47	9.62	8.56	8.32	9.57	10.81	12.55	59.43
Jonkheer van Tets (st.)	8.3	13.22	9.8	11.79	7.89	14.61	65.61
Jonkheer van Tets (st.)	8.02	13.04	9.32	11.12	7.62	14.34	63.46
Jonkheer van Tets (st.)	8.89	13.68	10.28	11.72	8.63	15.16	68.36
	Years
Genotypes	y 2013	y 2014	y 2015	y 2016	y 2017	y 2018	Sum
44-5-2	17.5	16.3767	15.05	18.9	13.2967	19.5967	100.72
78-2-115	7	8.96	8.40333	13.8	12.5967	14.7	65.46
143-23-25	16.71	12.6067	12.6033	14.7	15.4433	16.8	88.8633
1426-21-80	13.3467	9.8	9.8	22.3833	17.4	7.00333	79.7333
271-58-24	9.89667	5.6	8.69	7	8.42	7.00333	46.61
261-65-19	10.8	4.91	7.70333	11.1933	10.1567	10.5167	55.28
77-1-47	9.80667	8.39667	8	9.45667	11.0033	12.4333	59.0967
Jonkheer van Tets (st.)	8.40333	13.3133	9.8	11.5433	8.04667	14.7033	65.81
	Years
Genotypes	y 2013	y 2014	y 2015	y 2016	y 2017	y 2018	Sum
44-5-2	0.287924	0.248261	0.308058	0.389744	0.419682	0.283078	1.79156
78-2-115	0.0916515	0.21	0.0873689	0.12	0.205994	0.17	0.852819
143-23-25	0.455082	0.416813	0.686027	0.41	0.464363	0.09	2.33731
1426-21-80	0.590028	0.34	0.497594	1.52507	0.64	0.555008	4.14103
271-58-24	0.485215	0.46	0.71631	0.510686	0.665658	0.683837	3.39111
261-65-19	0.523068	0.08544	0.10504	0.380175	0.16563	0.051316	1.22049
77-1-47	0.459384	0.318172	0.571664	0.296704	0.480139	0.302379	2.24861
Jonkheer van Tets (st.)	0.44411	0.330051	0.48	0.368284	0.522909	0.417892	2.45611
