# Supplementary material for: Creation and Use of Highly Adaptive Productive and Technological Red Currant Genotypes to Improve the Assortment and Introduction into Different Ecological and Geographical Zones
Source: Plants (Basel). 2022 Mar 17;11(6):802. doi: 10.3390/plants11060802 (PMC8954894; doi:10.3390/plants11060802)
Supplement: Supplementary file 1 [file plants-11-00802-s001.zip › Supplement 4.xls]

## Sheet: Supplement 4
Sphaerotheca mors-uvae ((Schw.) Berk et Curt.)
	Years
Genotypes	y 2013	y 2014	y 2015	y 2016	y 2017	y 2018
44-5-2	0	1	0	0	1	1
44-5-2	0	1	0	0	1	1
44-5-2	1	1	1	1	1	2
44-5-2	1	1	1	1	1	2
44-5-2	0	1	0	0	1	1
78-2-115	1	1	1	2	2	3
78-2-115	1	1	1	2	2	4
78-2-115	2	1	1	2	2	4
78-2-115	2	1	1	1	2	3
78-2-115	1	1	1	1	2	3
143-23-25	2	1	2	1	1	3
143-23-25	2	1	2	2	1	3
143-23-25	2	1	1	2	2	3
143-23-25	2	1	1	1	2	3
143-23-25	2	1	1	1	2	3
1426-21-80	2	1	1	1	2	3
1426-21-80	2	1	1	1	2	3
1426-21-80	2	0	1	2	2	4
1426-21-80	2	0	1	2	2	4
1426-21-80	2	0	1	1	2	3
271-58-24	2	1	1	2	2	2
271-58-24	2	2	1	2	2	2
271-58-24	2	2	2	2	2	3
271-58-24	2	1	2	2	2	3
271-58-24	2	1	1	2	2	2
261-65-19	1	1	1	1	1	2
261-65-19	1	1	1	0	1	2
261-65-19	1	1	0	0	2	2
261-65-19	1	1	0	1	2	2
261-65-19	1	1	0	1	1	2
77-1-47	2	2	1	1	2	3
77-1-47	2	2	1	1	2	4
77-1-47	2	1	2	2	3	4
77-1-47	2	1	2	2	3	3
77-1-47	2	1	1	2	2	3
Jonkheer van Tets (st.)	0	0	1	2	2	1
Jonkheer van Tets (st.)	0	0	1	3	2	1
Jonkheer van Tets (st.)	1	0	2	3	3	1
Jonkheer van Tets (st.)	1	1	2	2	3	1
Jonkheer van Tets (st.)	0	1	1	2	3	1
	Years
Genotypes	y 2013	y 2014	y 2015	y 2016	y 2017	y 2018
44-5-2	0.4	1	0.4	0.4	1	1.4
78-2-115	1.4	1	1	1.6	2	3.4
143-23-25	2	1	1.4	1.4	1.6	3
1426-21-80	2	0.4	1	1.4	2	3.4
271-58-24	2	1.4	1.4	2	2	2.4
261-65-19	1	1	0.4	0.6	1.4	2
77-1-47	2	1.4	1.4	1.6	2.4	3.4
Jonkheer van Tets (st.)	0.4	0.4	1.4	2.4	2.6	1
	Years
Genotypes	y 2013	y 2014	y 2015	y 2016	y 2017	y 2018
44-5-2	0.547723	0	0.547723	0.547723	0	0.547723
78-2-115	0.547723	0	0	0.547723	0	0.547723
143-23-25	0	0	0.547723	0.547723	0.547723	0
1426-21-80	0	0.547723	0	0.547723	0	0.547723
271-58-24	0	0.547723	0.547723	0	0	0.547723
261-65-19	0	0	0.547723	0.547723	0.547723	0
77-1-47	0	0.547723	0.547723	0.547723	0.547723	0.547723
Jonkheer van Tets (st.)	0.547723	0.547723	0.547723	0.547723	0.547723	0
