# Supplementary material for: Creation and Use of Highly Adaptive Productive and Technological Red Currant Genotypes to Improve the Assortment and Introduction into Different Ecological and Geographical Zones
Source: Plants (Basel). 2022 Mar 17;11(6):802. doi: 10.3390/plants11060802 (PMC8954894; doi:10.3390/plants11060802)
Supplement: Supplementary file 1 [file plants-11-00802-s001.zip › Supplement 5.xls]

## Sheet: Supplement 5
Pseudopeziza ribis Kleb.
	Years
Genotypes	y 2013	y 2014	y 2015	y 2016	y 2017	y 2018
44-5-2	0	1	1	1	0	0
44-5-2	0	2	1	1	0	0
44-5-2	0	2	1	2	0	0
44-5-2	1	1	2	1	0	0
44-5-2	1	1	2	2	0	0
78-2-115	0	1	1	1	0	0
78-2-115	0	1	1	1	0	0
78-2-115	1	2	1	2	1	1
78-2-115	1	2	2	2	1	1
78-2-115	0	1	2	2	0	0
143-23-25	1	2	2	2	2	2
143-23-25	1	2	2	2	2	2
143-23-25	2	2	2	3	3	2
143-23-25	2	2	2	3	3	2
143-23-25	1	2	2	2	2	2
1426-21-80	1	1	1	2	2	1
1426-21-80	1	1	1	2	2	1
1426-21-80	2	2	2	2	3	2
1426-21-80	2	2	2	2	3	2
1426-21-80	1	1	1	2	2	1
271-58-24	1	1	1	1	1	1
271-58-24	1	1	1	1	2	1
271-58-24	1	1	1	1	2	1
271-58-24	1	1	1	1	1	1
271-58-24	1	1	1	1	1	1
261-65-19	1	1	1	1	1	1
261-65-19	1	1	1	1	1	1
261-65-19	1	1	1	1	1	1
261-65-19	2	1	1	2	2	1
261-65-19	2	1	1	2	2	1
77-1-47	1	2	1	2	2	2
77-1-47	0	3	1	2	2	2
77-1-47	0	3	1	2	2	1
77-1-47	1	2	2	2	2	1
77-1-47	0	2	2	2	2	1
Jonkheer van Tets (st.)	0	0	1	1	0	0
Jonkheer van Tets (st.)	0	0	1	1	0	1
Jonkheer van Tets (st.)	0	0	1	0	0	1
Jonkheer van Tets (st.)	0	0	1	0	1	0
Jonkheer van Tets (st.)	0	0	1	0	1	0
	Years
Genotypes	y 2013	y 2014	y 2015	y 2016	y 2017	y 2018
44-5-2	0.4	1.4	1.4	1.4	0	0
78-2-115	0.4	1.4	1.4	1.6	0.4	0.4
143-23-25	1.4	2	2	2.4	2.4	2
1426-21-80	1.4	1.4	1.4	2	2.4	1.4
271-58-24	1	1	1	1	1.4	1
261-65-19	1.4	1	1	1.4	1.4	1
77-1-47	0.4	2.4	1.4	2	2	1.4
Jonkheer van Tets (st.)	0	0	1	0.4	0.4	0.4
	Years
Genotypes	y 2013	y 2014	y 2015	y 2016	y 2017	y 2018
44-5-2	0.547723	0.547723	0.547723	0.547723	0	0
78-2-115	0.547723	0.547723	0.547723	0.547723	0.547723	0.547723
143-23-25	0.547723	0	0	0.547723	0.547723	0
1426-21-80	0.547723	0.547723	0.547723	0	0.547723	0.547723
271-58-24	0	0	0	0	0.547723	0
261-65-19	0.547723	0	0	0.547723	0.547723	0
77-1-47	0.547723	0.547723	0.547723	0	0	0.547723
Jonkheer van Tets (st.)	0	0	0	0.547723	0.547723	0.547723
